# Supplementary material
Source: Research Square preprint supplement (doi:10.21203/rs.3.rs-8921502/v1)
Supplement: Supplementary file 1 [file f51335ac40cef5e8deea49f3.docx]

Table 1. Variable source, associated hypothesis, level of data, and inclusion in reduced model

|  | **Source: CGSS or NBSC** | **Associated with Hypothesis?** |
| --- | --- | --- |
| **Zero Fertility Desire** | CGSS: Without policy restrictions how many children do you want? | N/A (dependent variable) |
| **Gender** | CGSS: gender | Hypothesis 3,4,5 |
| **Rural Hukou** | CGSS: what is your current household registration status? | Hypothesis 2 |
| **College** | CGSS: what is your highest level of education? | Hypothesis 1 |
| **Student status** | CGSS: what is your highest level of education? | Control |
| **Parent College** | CGSS: What is the highest level of education received by your father and/or your mother? | Control |
| **Full time mom** | CGSS: What is your mother’s employment status when you were 14? | Control |
| **Has partner** | CGSS: what is your marital status? (Married, cohabiting) | Control |
| **Has sibling** | CGSS: family members | Control |
| **Has brother** | CGSS: family members | Control |
| **Subjective Income** | CGSS: What do you think your family income compared to an average Chinese family when you were 15? | Control |
| **Self-rated Health** | CGSS: How do you rate your current health condition on a 5-point scale? | Control |
| **Economic Region**  **(East==1, Middle==2,**  **Northeast==3,**  **West==4)** | CGSS: interview location, provincial | Control |

Table 2. Young adults with zero fertility desire, grouped by education (percentage)

| **Highest Education** | **2012** | **2015** | **2017** | **2018** | **2021** | **2023** |
| --- | --- | --- | --- | --- | --- | --- |
| **9 years or less** | 10.23 | 6.17 | 11.03 | 12.47 | 12.43 | 5.78 |
| **Secondary 9+** | 22.50 | 38.38 | 31.58 | 29.87 | 23.15 | 19.05 |
| **Post Secondary 12+** | 67.27 | 55.46 | 57.4 | 57.65 | 64.42 | 75.15 |

Table 3. Young adults with zero fertility desire, grouped by Hukou status (percentage)

| **Hukou** | **2012** | **2015** | **2017** | **2018** | **2021** | **2023** |
| --- | --- | --- | --- | --- | --- | --- |
| **Rural** | 33.91 | 43.79 | 61.53 | 47.07 | 45.11 | 61.63 |
| **Urban** | 66.09 | 56.21 | 38.47 | 52.93 | 54.89 | 38.37 |

Table 4. Logistic Regressions of Zero Fertility Desire, Odds Ratios.


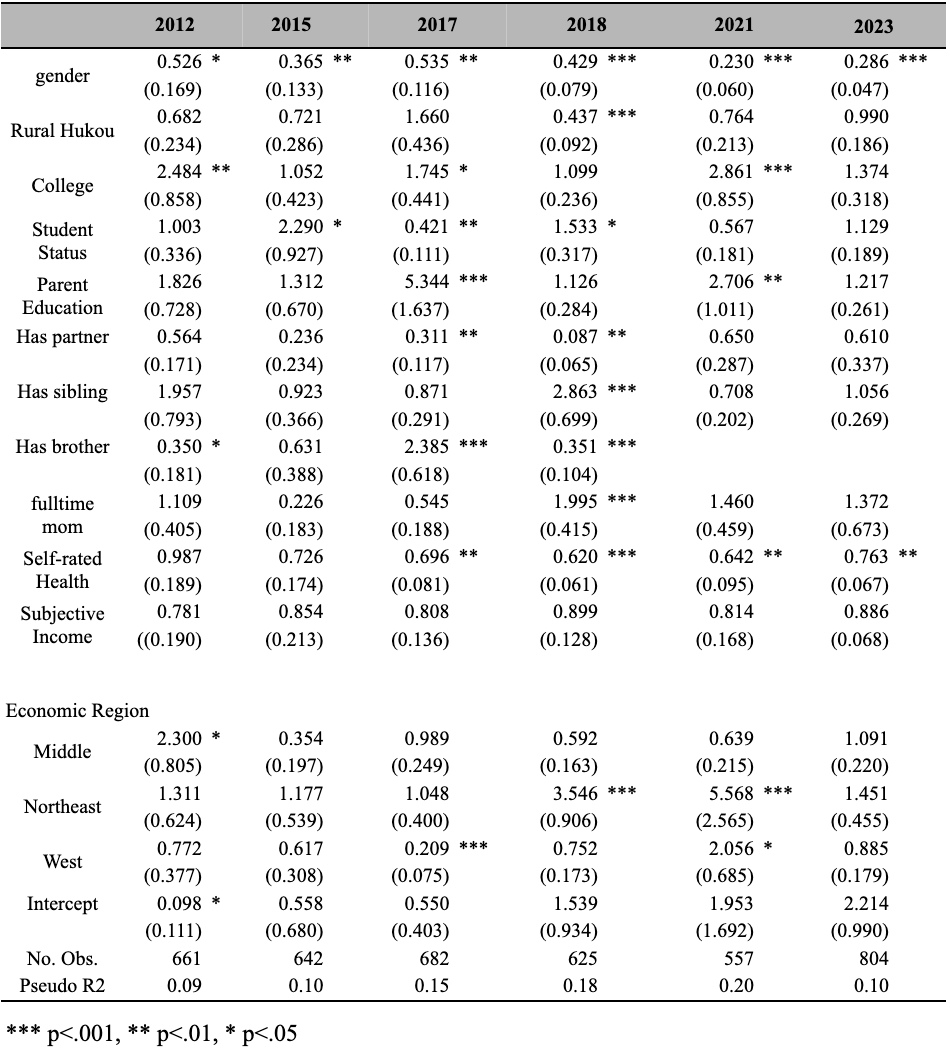


Table 5. Logistic Regression of Zero Fertilit
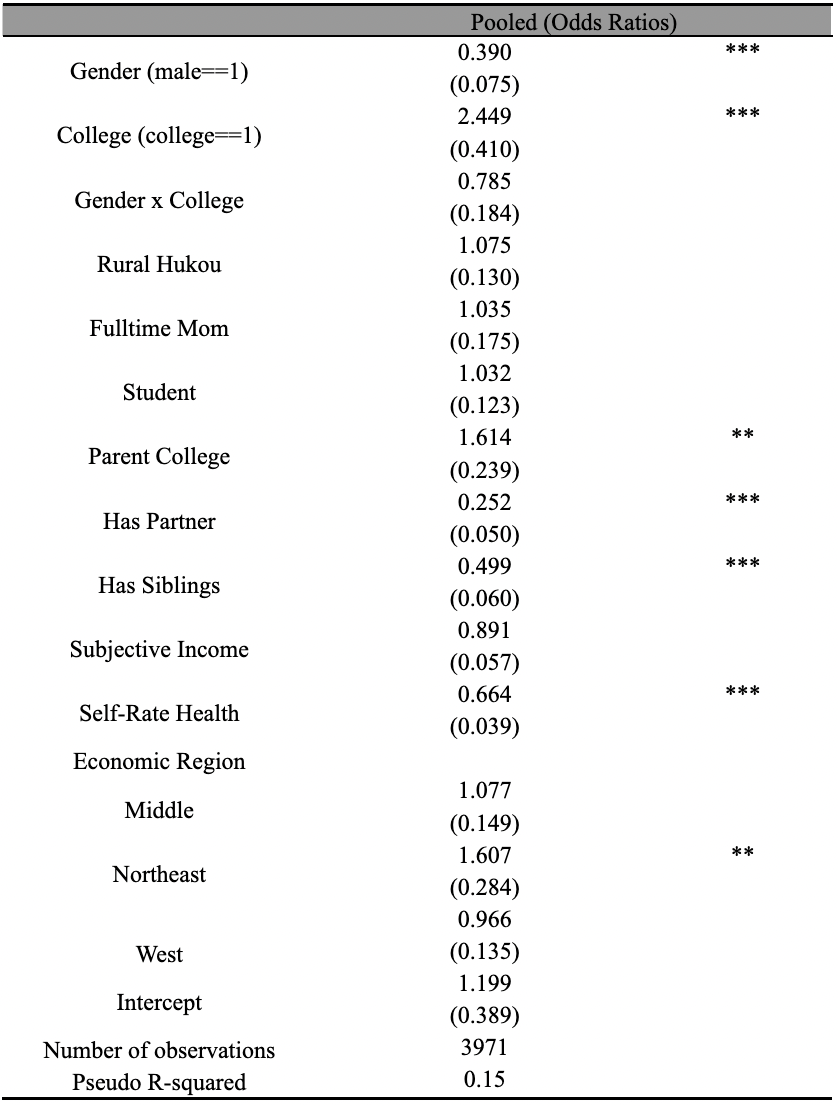
y Desire with Gender x Education Interaction

Table 6. Logistic Regression of Zero fertility Desire with Interaction Gender x Hukou
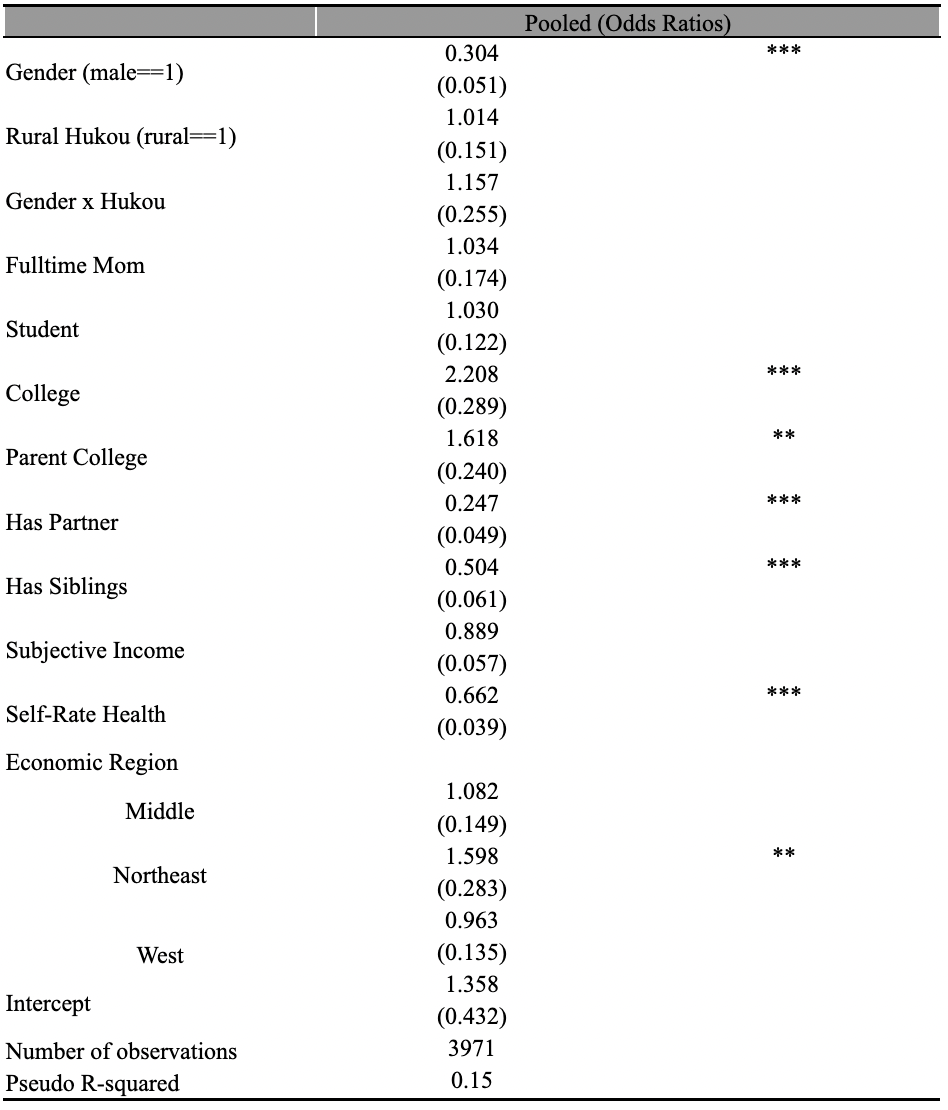


Table 7. Tabulation of young adults aged 18 to 24 by province, 2021

| Province | Freq. | Percent | Cum. |
| --- | --- | --- | --- |
| Inner Mongolia | 6 | 1.04 | 1.04 |
| Beijing | 32 | 5.54 | 6.57 |
| Ningxia | 15 | 2.60 | 9.17 |
| Anhui | 9 | 1.56 | 10.73 |
| Shangdong | 31 | 5.36 | 16.09 |
| Shanxi | 29 | 5.02 | 21.11 |
| Guangxi | 25 | 4.33 | 25.43 |
| Jiangsu | 32 | 5.54 | 30.97 |
| Jiangxi | 96 | 16.61 | 47.58 |
| Hebei | 17 | 2.94 | 50.52 |
| Henan | 39 | 6.75 | 57.27 |
| Zhejiang | 32 | 5.54 | 62.80 |
| Hubei | 26 | 4.50 | 67.30 |
| Hunan | 55 | 9.52 | 76.82 |
| Gansu | 29 | 5.02 | 81.83 |
| Fujian | 5 | 0.87 | 82.70 |
| Liaoning | 22 | 3.81 | 86.51 |
| Chongqing | 64 | 11.07 | 97.58 |
| Shaanxi | 14 | 2.42 | 100.00 |
| Total | 578 | 100.00 |  |
